# Supplementary material for: Impact of PET reconstruction on Aβ-amyloid quantitation in cross-sectional and longitudinal analyses
Source: bioRxiv or medRxiv preprint supplement (doi:10.1101/2023.07.03.23292155), 2023-07-03
Supplement: Supplementary file [file media-1.pdf]

# Impact of PET reconstruction on A $\beta$ -amyloid quantitation in cross-sectional and longitudinal analyses

Gihan P. Ruwanpathirana<sup>1,2</sup>, Robert C. Williams<sup>2</sup>, Colin L. Masters<sup>3,4</sup>, Christopher C. Rowe<sup>3,4,5</sup>, Catherine E. Davey<sup>1,2</sup>, Leigh A. Johnston<sup>1,2</sup>

1 Department of Biomedical Engineering, The University of Melbourne, Melbourne, VIC, Australia.

2 Melbourne Brain Centre Imaging Unit, The University of Melbourne, Melbourne, VIC, Australia

3 Florey Institute of Neurosciences and Mental Health, The University of Melbourne, Melbourne, VIC, Australia

4 The Australian Dementia Network (ADNET), Melbourne, Australia

5 Department of Molecular Imaging & Therapy, Melbourne, Austin Health, VIC, Australia

## SUPPLEMENTARY MATERIALS

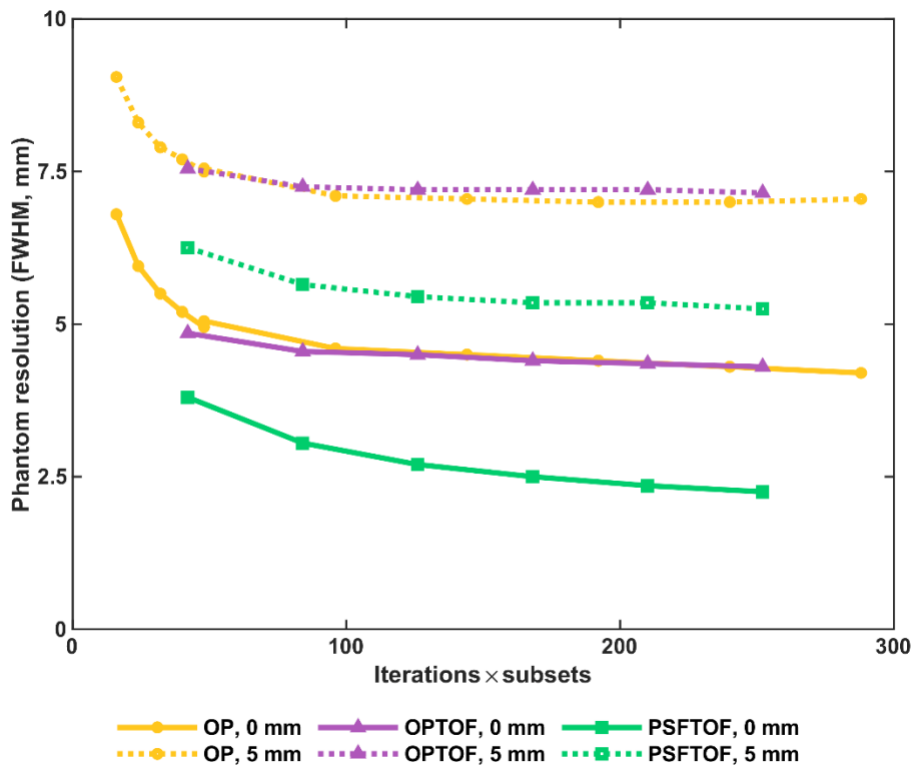

**FIGURE S1: Iteration update vs phantom resolution.** Comparison of the barrel phantom calculated

spatial resolution (FWHM) with the iteration update while using a post-reconstruction Gaussian smoothing of 0 mm and 5 mm.

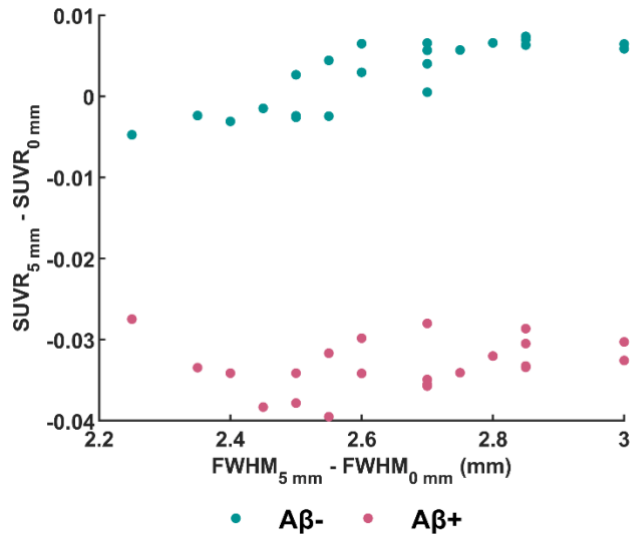

**FIGURE S2: The impact of post-reconstruction smoothing on Aβ SUVR.** Change in mean SUVR for each reconstruction group after the application of a 5 mm post-reconstruction Gaussian smoothing. Aβ- and Aβ+ groups are shown separately. Note: Error bars are not included as they are too small to be legible.

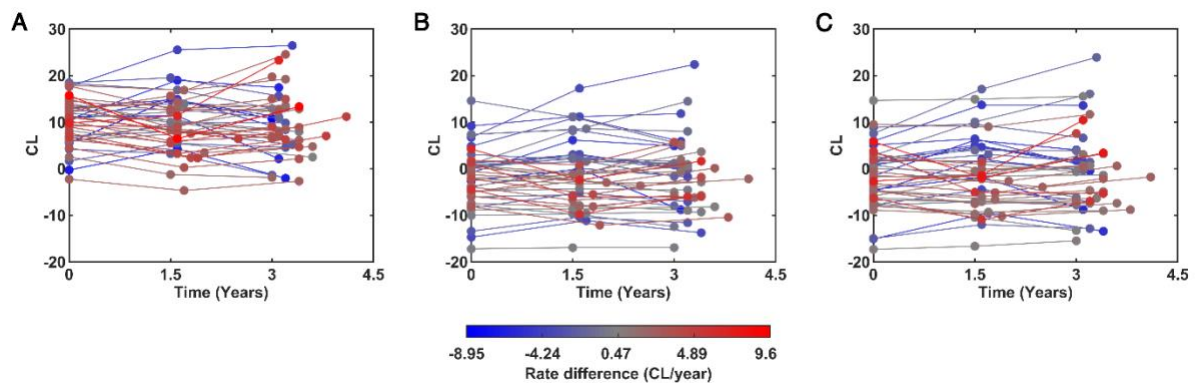

**FIGURE S3: Summary of Aβ- longitudinal data reconstructed with low-, medium- and high-resolution reconstruction configurations.** The impact of PET spatial resolution on the Aβ accumulation rate difference

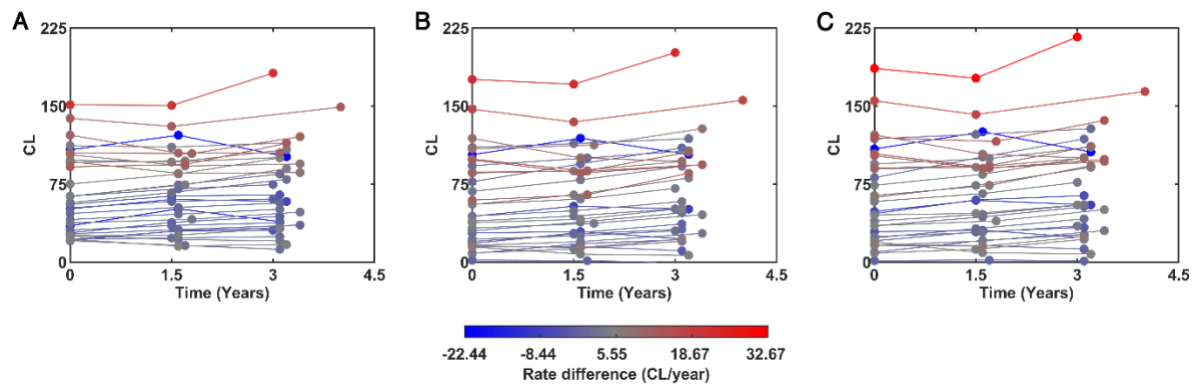

**FIGURE S4: Summary of Aβ+ longitudinal data reconstructed with low-, medium- and high-resolution reconstruction configurations.** The impact of PET spatial resolution on the Aβ accumulation rate difference.

**TABLE S1:** Demographics of Cross-sectional and Longitudinal study datasets.

| Study Type                         | Cross-sectional  |                  | Longitudinal     |                  |
|------------------------------------|------------------|------------------|------------------|------------------|
|                                    | A $\beta$ -      | A $\beta$ +      | A $\beta$ -      | A $\beta$ +      |
| <b>A<math>\beta</math> group</b>   | A $\beta$ -      | A $\beta$ +      | A $\beta$ -      | A $\beta$ +      |
| <b>Sample size</b>                 | 44               | 45               | 46               | 33               |
| <b>Sex. F (%)</b>                  | 26 (59)          | 26 (58)          | 22 (47.83)       | 13 (39.39)       |
| <b>Age <math>\pm</math> SD</b>     | 71 $\pm$ 3.77    | 70.78 $\pm$ 3.96 | 71.91 $\pm$ 4.51 | 74.00 $\pm$ 5.59 |
| <b>% Right hand</b>                | 91               | 91               | 89*              | 84*              |
| <b>% APOE4</b>                     | 21*              | 70**             | 15               | 39               |
| <b>CU, MCI, AD</b>                 | 41, 0, 0***      | 37, 4, 0****     | 41, 4, 1         | 24, 4, 4*        |
| <b>MMSE <math>\pm</math> SD</b>    | 27.9 $\pm$ 1.22  | 27.71 $\pm$ 1.33 | 29.09 $\pm$ 0.98 | 27.52 $\pm$ 2.83 |
| <b>CDR <math>\pm</math> SD</b>     | 0 $\pm$ 0*       | 0.03 $\pm$ 0.13  | 0.05 $\pm$ 0.19  | 0.17 $\pm$ 0.30  |
| <b>CDR-SoB <math>\pm</math> SD</b> | 0.01 $\pm$ 0.08* | 0.09 $\pm$ 0.22  | 0.18 $\pm$ 1.03  | 0.79 $\pm$ 1.90  |

Demographics marked with \* are missing values from some subjects, where the number of \* corresponds to the number of subjects missing. F = Female, SD = Standard Deviation, APOE4 = Apolipoprotein E4, CU = Cognitively unimpaired, MCI = Mild Cognitively Unimpaired, AD = Alzheimer's Disease, MMSE = Mini-Mental State Examination, CDR = Clinical Dementia Rating, CDR-SoB = Clinical Dementia Rating Scale Sum of Boxes.

**TABLE S2:** Reconstruction configurations used in the cross-sectional analysis and their relevant A $\beta$ -PET SUVR and FWHM values.

| Reconstruction method | Iterations | Subsets | Filter size (mm) | FWHM (mm) | Mean SUVR of A $\beta$ -group | SD of A $\beta$ -group | Mean SUVR of A $\beta$ + group | SD of A $\beta$ -group |
|-----------------------|------------|---------|------------------|-----------|-------------------------------|------------------------|--------------------------------|------------------------|
| PSFTOF                | 12         | 21      | 0                | 2.25      | 0.933                         | 0.077                  | 1.438                          | 0.215                  |
| PSFTOF                | 10         | 21      | 0                | 2.35      | 0.932                         | 0.079                  | 1.439                          | 0.216                  |
| PSFTOF                | 12         | 21      | 1                | 2.35      | 0.934                         | 0.077                  | 1.439                          | 0.214                  |
| PSFTOF                | 10         | 21      | 1                | 2.45      | 0.932                         | 0.077                  | 1.439                          | 0.215                  |
| PSFTOF                | 8          | 21      | 0                | 2.5       | 0.933                         | 0.077                  | 1.438                          | 0.215                  |
| PSFTOF                | 8          | 21      | 1                | 2.55      | 0.934                         | 0.077                  | 1.439                          | 0.216                  |
| PSFTOF                | 6          | 21      | 0                | 2.7       | 0.932                         | 0.077                  | 1.438                          | 0.215                  |
| PSFTOF                | 6          | 21      | 1                | 2.75      | 0.932                         | 0.077                  | 1.438                          | 0.216                  |
| PSFTOF                | 4          | 21      | 0                | 3.05      | 0.937                         | 0.076                  | 1.434                          | 0.214                  |
| PSFTOF                | 4          | 21      | 1                | 3.1       | 0.937                         | 0.075                  | 1.435                          | 0.215                  |
| PSFTOF                | 2          | 21      | 0                | 3.8       | 0.936                         | 0.073                  | 1.415                          | 0.214                  |
| PSFTOF                | 2          | 21      | 1                | 3.9       | 0.935                         | 0.073                  | 1.414                          | 0.213                  |
| OP                    | 2          | 24      | 0                | 4.2       | 0.936                         | 0.073                  | 1.419                          | 0.211                  |
| OPTOF                 | 12         | 21      | 0                | 4.3       | 0.934                         | 0.073                  | 1.404                          | 0.202                  |
| OP                    | 10         | 24      | 0                | 4.3       | 0.936                         | 0.072                  | 1.419                          | 0.212                  |
| OPTOF                 | 10         | 21      | 0                | 4.35      | 0.934                         | 0.073                  | 1.405                          | 0.201                  |
| OP                    | 12         | 24      | 1                | 4.35      | 0.936                         | 0.072                  | 1.419                          | 0.211                  |
| OPTOF                 | 12         | 21      | 1                | 4.4       | 0.934                         | 0.072                  | 1.402                          | 0.202                  |

|        |    |    |   |      |       |       |       |       |
|--------|----|----|---|------|-------|-------|-------|-------|
| OP     | 8  | 24 | 0 | 4.4  | 0.935 | 0.073 | 1.418 | 0.210 |
| OPTOF  | 8  | 21 | 0 | 4.4  | 0.938 | 0.073 | 1.404 | 0.202 |
| OPTOF  | 10 | 21 | 1 | 4.45 | 0.934 | 0.073 | 1.402 | 0.202 |
| OP     | 10 | 24 | 1 | 4.45 | 0.935 | 0.072 | 1.418 | 0.211 |
| OP     | 8  | 24 | 1 | 4.5  | 0.935 | 0.073 | 1.418 | 0.210 |
| OPTOF  | 6  | 21 | 0 | 4.5  | 0.935 | 0.073 | 1.405 | 0.200 |
| OP     | 6  | 24 | 0 | 4.5  | 0.937 | 0.071 | 1.419 | 0.211 |
| OPTOF  | 8  | 21 | 1 | 4.5  | 0.938 | 0.074 | 1.401 | 0.200 |
| OPTOF  | 4  | 21 | 0 | 4.55 | 0.935 | 0.071 | 1.400 | 0.202 |
| OPTOF  | 6  | 21 | 1 | 4.6  | 0.935 | 0.072 | 1.401 | 0.201 |
| OP     | 6  | 24 | 1 | 4.6  | 0.937 | 0.071 | 1.417 | 0.210 |
| OP     | 4  | 24 | 0 | 4.6  | 0.939 | 0.072 | 1.417 | 0.211 |
| OPTOF  | 4  | 21 | 1 | 4.65 | 0.935 | 0.071 | 1.400 | 0.202 |
| OP     | 4  | 24 | 1 | 4.7  | 0.939 | 0.072 | 1.416 | 0.211 |
| OPTOF  | 2  | 21 | 0 | 4.85 | 0.937 | 0.070 | 1.393 | 0.201 |
| OPTOF  | 2  | 21 | 1 | 4.9  | 0.937 | 0.070 | 1.391 | 0.200 |
| OP     | 2  | 24 | 0 | 4.95 | 0.950 | 0.069 | 1.415 | 0.208 |
| OP     | 12 | 4  | 0 | 5.05 | 0.951 | 0.069 | 1.419 | 0.210 |
| OP     | 2  | 2  | 1 | 5.1  | 0.950 | 0.068 | 1.417 | 0.209 |
| OP     | 12 | 4  | 1 | 5.15 | 0.951 | 0.070 | 1.418 | 0.208 |
| OP     | 10 | 4  | 0 | 5.2  | 0.955 | 0.069 | 1.418 | 0.208 |
| PSFTOF | 12 | 21 | 5 | 5.25 | 0.940 | 0.073 | 1.408 | 0.203 |
| PSFTOF | 10 | 21 | 5 | 5.35 | 0.938 | 0.072 | 1.406 | 0.201 |
| PSFTOF | 8  | 21 | 5 | 5.35 | 0.939 | 0.072 | 1.405 | 0.202 |
| OP     | 10 | 4  | 1 | 5.35 | 0.955 | 0.068 | 1.416 | 0.209 |
| PSFTOF | 6  | 21 | 5 | 5.45 | 0.938 | 0.071 | 1.404 | 0.202 |
| OP     | 8  | 4  | 0 | 5.5  | 0.962 | 0.071 | 1.416 | 0.203 |
| OP     | 8  | 4  | 1 | 5.55 | 0.961 | 0.070 | 1.416 | 0.202 |
| PSFTOF | 4  | 21 | 5 | 5.65 | 0.939 | 0.069 | 1.399 | 0.203 |
| OP     | 6  | 4  | 0 | 5.95 | 0.975 | 0.070 | 1.413 | 0.197 |
| OP     | 6  | 4  | 1 | 6    | 0.975 | 0.070 | 1.413 | 0.196 |
| PSFTOF | 2  | 21 | 5 | 6.25 | 0.934 | 0.066 | 1.376 | 0.198 |
| OP     | 4  | 4  | 0 | 6.8  | 0.999 | 0.073 | 1.405 | 0.180 |
| OP     | 4  | 4  | 1 | 6.85 | 0.998 | 0.072 | 1.405 | 0.179 |
| OP     | 8  | 24 | 5 | 7    | 0.942 | 0.065 | 1.388 | 0.199 |
| OP     | 10 | 24 | 5 | 7    | 0.942 | 0.064 | 1.391 | 0.199 |
| OP     | 12 | 24 | 5 | 7.05 | 0.943 | 0.064 | 1.390 | 0.199 |
| OP     | 6  | 24 | 5 | 7.05 | 0.942 | 0.063 | 1.387 | 0.200 |
| OP     | 4  | 24 | 5 | 7.1  | 0.942 | 0.063 | 1.383 | 0.199 |
| OPTOF  | 12 | 21 | 5 | 7.15 | 0.942 | 0.065 | 1.373 | 0.190 |
| OPTOF  | 6  | 21 | 5 | 7.2  | 0.940 | 0.065 | 1.371 | 0.189 |
| OPTOF  | 10 | 21 | 5 | 7.2  | 0.941 | 0.065 | 1.371 | 0.188 |
| OPTOF  | 8  | 21 | 5 | 7.2  | 0.945 | 0.067 | 1.372 | 0.188 |
| OPTOF  | 4  | 21 | 5 | 7.25 | 0.939 | 0.064 | 1.365 | 0.186 |

|       |    |    |   |      |       |       |       |       |
|-------|----|----|---|------|-------|-------|-------|-------|
| OP    | 2  | 24 | 5 | 7.5  | 0.948 | 0.060 | 1.376 | 0.191 |
| OPTOF | 2  | 21 | 5 | 7.55 | 0.938 | 0.062 | 1.357 | 0.184 |
| OP    | 12 | 4  | 5 | 7.55 | 0.948 | 0.061 | 1.377 | 0.196 |
| OP    | 10 | 4  | 5 | 7.7  | 0.953 | 0.061 | 1.380 | 0.192 |
| OP    | 8  | 4  | 5 | 7.9  | 0.959 | 0.062 | 1.382 | 0.189 |
| OP    | 6  | 4  | 5 | 8.3  | 0.973 | 0.064 | 1.380 | 0.182 |
| OP    | 4  | 4  | 5 | 9.05 | 0.994 | 0.066 | 1.377 | 0.168 |
